# Supplementary material for: An Ag-modified GaAlTe2 monolayer: a high-performance gas sensor for detecting asphyxiating gases
Source: Royal Society of Chemistry journal article supplement (doi:10.1039/d5nj00706b), 2025-01-01
Supplement: d5nj00706b1.pdf [file d5nj00706b1.pdf]

## Ag-Modified GaAlTe<sub>2</sub> Monolayer: A High-Performance Gas Sensor for Detecting Asphyxiating Gases

Disha Mehta<sup>a</sup>, Yashasvi Naik<sup>a</sup>, Nidhi Modi<sup>b</sup>, P. B. Thakor<sup>\*a</sup>

<sup>a</sup> Department of Physics, Veer Narmad South Gujarat University, Surat, Gujarat, 395007, India

<sup>b</sup> Department of Physics, Sir P. T. Sarvajani College of Science, Surat, Gujarat, 395001, India

\*Corresponding author: P. B. Thakor

E-mail: [pbthakor@rediffmail.com](mailto:pbthakor@rediffmail.com)

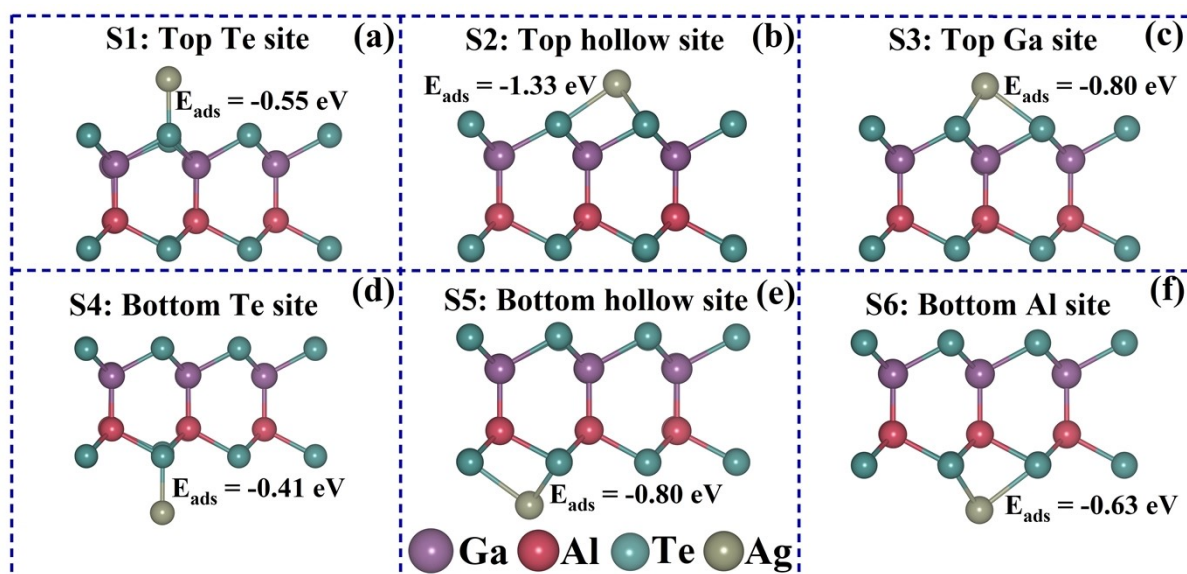

**Figure S1.** Optimized structures of the Ag functionalized GaAlTe<sub>2</sub> ML for six different sites with their binding energies

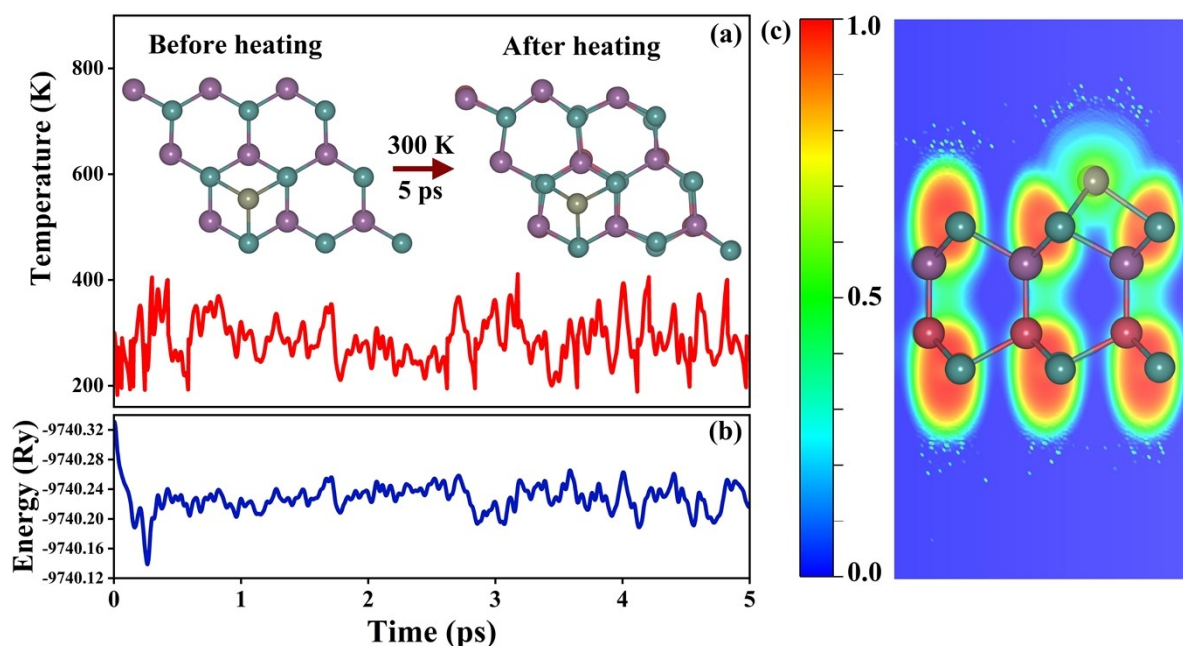

**Figure S2.** (a) AIMD and (b) ELF plot of the Ag-GaAlTe<sub>2</sub> ML
